# Supplementary material
Source: publisher figshare collection journal article supplement (https://frontiersin.figshare.com/ndownloader/files/24165650)
Supplement: Supplementary file [file 24165650]

## Supplementary Material

**Supplementary Table 1.** Comparisons between control and ADHD groups, given separately for two different studies from which ADHD data were pooled, mean  $\pm$  standard deviation.

|                                              | controls          | ADHD (n = 24)     |                         |          | ADHD (n = 10)     |                         |          |
|----------------------------------------------|-------------------|-------------------|-------------------------|----------|-------------------|-------------------------|----------|
|                                              |                   | values            | <i>t</i>                | <i>p</i> | values            | <i>t</i>                | <i>p</i> |
| WM in %                                      | 73.83 $\pm$ 15.39 | 49.43 $\pm$ 22.76 | <i>t</i> (47.0) = 4.41  | < .001   | 56.87 $\pm$ 21.07 | <i>t</i> (33.0) = 2.65  | .012     |
| RI in %                                      | 87.44 $\pm$ 8.35  | 73.52 $\pm$ 19.42 | <i>t</i> (31.0) = 3.24  | .003     | 88.25 $\pm$ 6.76  | <i>t</i> (33.0) = -0.27 | .788     |
| omission errors in %                         | 1.07 $\pm$ 1.25   | 10.14 $\pm$ 11.89 | <i>t</i> (23.5) = -3.72 | .001     | 2.47 $\pm$ 1.81   | <i>t</i> (12.6) = -2.25 | .043     |
| reaction time in ms                          | 722 $\pm$ 194     | 839 $\pm$ 206     | <i>t</i> (47.0) = -2.05 | .046     | 819 $\pm$ 182     | <i>t</i> (33.0) = -1.35 | .186     |
| SD of reaction time in ms                    | 252 $\pm$ 72      | 330 $\pm$ 69      | <i>t</i> (47.0) = -3.86 | < .001   | 282 $\pm$ 74      | <i>t</i> (33.0) = -1.09 | .284     |
| <i>n</i> -back P3 amplitude at Pz in $\mu$ V | 17.53 $\pm$ 7.33  | 14.56 $\pm$ 4.77  | <i>t</i> (47.0) = 1.67  | .101     | 11.49 $\pm$ 7.83  | <i>t</i> (31.0) = 2.00  | .054     |
| nogo N2 amplitude at Cz in $\mu$ V           | -0.67 $\pm$ 5.69  | -2.76 $\pm$ 5.68  | <i>t</i> (45.0) = 1.26  | .215     | -3.50 $\pm$ 6.66  | <i>t</i> (32.0) = 1.23  | .229     |
| nogo P3 amplitude at Cz in $\mu$ V           | 18.81 $\pm$ 8.82  | 12.59 $\pm$ 7.12  | <i>t</i> (45.0) = 2.64  | .012     | 6.88 $\pm$ 6.09   | <i>t</i> (32.0) = 3.73  | .001     |
| <i>n</i> -back P3 latency at Pz in ms        | 392 $\pm$ 51      | 395 $\pm$ 69      | <i>t</i> (42.4) = -0.16 | .878     | 409 $\pm$ 56      | <i>t</i> (31.0) = -0.79 | .437     |
| nogo N2 latency at Cz in ms                  | 328 $\pm$ 55      | 365 $\pm$ 54      | <i>t</i> (45.0) = -2.36 | .023     | 356 $\pm$ 59      | <i>t</i> (32.0) = -1.30 | .204     |
| nogo P3 latency at Cz in ms                  | 551 $\pm$ 49      | 557 $\pm$ 42      | <i>t</i> (45.0) = -0.47 | .640     | 532 $\pm$ 62      | <i>t</i> (32.0) = 0.91  | .368     |

WM – working memory performance, RI – response inhibition performance

**Supplementary Table 2.** Results of ANOVAs for ERP analysis,  $F$  and  $p$ -values as well as effect sizes  $\eta^2$  are given.

| Condition<br>Comparison         | Stimulus<br>go vs. nogo / target vs. non-target | Task<br>single vs. combined                    | Group<br>control vs. ADHD                   |
|---------------------------------|-------------------------------------------------|------------------------------------------------|---------------------------------------------|
| <i>n-back P3 amplitude</i>      |                                                 |                                                |                                             |
| condition                       | $F(1, 24) = 45.54, p < .001, \eta^2 = .655$     | $F(1, 24) = 0.83, p = .372, \eta^2 = .033$     | $F(1, 55) = 4.44, p = .040, \eta^2 = .075$  |
| region                          | $F(1, 24) = 79.25, p < .001, \eta^2 = .768$     | -                                              | -                                           |
| hemisphere                      | $F(1.4, 34.0) = 6.72, p = .008, \eta^2 = .219$  | -                                              | -                                           |
| condition x region              | $F(1, 24) < 0.01, p = .966, \eta^2 < .001$      | $F(1, 24) = 1.35, p = .256, \eta^2 = .053$     | $F(1, 55) = 0.24, p = .624, \eta^2 = .004$  |
| condition x hemisphere          | $F(2, 48) = 3.33, p = .044, \eta^2 = .122$      | $F(2, 48) = 0.44, p = .644, \eta^2 = .018$     | $F(2, 110) = 0.77, p = .465, \eta^2 = .014$ |
| region x hemisphere             | $F(2, 48) = 1.346, p = .270, \eta^2 = .053$     | -                                              | -                                           |
| condition x region x hemisphere | $F(2, 48) = 1.44, p = .0246, \eta^2 = .057$     | $F(1.5, 36.9) = 1.45, p = .246, \eta^2 = .057$ | $F(2, 110) = 0.14, p = .866, \eta^2 = .003$ |
| <i>n-back P3 latency</i>        |                                                 |                                                |                                             |
| condition                       | $F(1, 24) < 0.01, p = .977, \eta^2 < .001$      | $F(1, 24) < 0.01, p = .964, \eta^2 < .001$     | $F(1, 55) = 0.28, p = .599, \eta^2 = .005$  |
| region                          | $F(1, 24) = 3.54, p = .072, \eta^2 = .129$      | -                                              | -                                           |
| hemisphere                      | $F(2, 48) = 1.02, p = .369, \eta^2 = .041$      | -                                              | -                                           |
| condition x region              | $F(1, 24) = 10.35, p = .004, \eta^2 = .301$     | $F(1, 24) = 0.21, p = .654, \eta^2 = .009$     | $F(1, 55) < 0.01, p = .996, \eta^2 < .001$  |
| condition x hemisphere          | $F(2, 48) = 5.41, p = .008, \eta^2 = .184$      | $F(1.6, 38.9) = 0.92, p = .388, \eta^2 = .037$ | $F(2, 110) = 0.58, p = .561, \eta^2 = .010$ |
| region x hemisphere             | $F(2, 48) = 0.31, p = .733, \eta^2 = .013$      | -                                              | -                                           |

|                                       |                                                |                                                |                                             |
|---------------------------------------|------------------------------------------------|------------------------------------------------|---------------------------------------------|
| condition x<br>region x<br>hemisphere | $F(2, 48) = 0.61, p = .548, \eta^2 = .025$     | $F(1.5, 36.4) = 0.40, p = .618, \eta^2 = .016$ | $F(2, 110) = 1.63, p = .200, \eta^2 = .029$ |
| <i>nogo N2 amplitude</i>              |                                                |                                                |                                             |
| condition                             | $F(1, 24) = 7.59, p = .011, \eta^2 = .240$     | $F(1, 24) = 0.52, p = .479, \eta^2 = .021$     | $F(1, 54) = 0.95, p = .335, \eta^2 = .017$  |
| region                                | $F(1, 24) = 33.33, p < .001, \eta^2 = .581$    | -                                              | -                                           |
| hemisphere                            | $F(2, 48) = 1.74, p = .186, \eta^2 = .068$     | -                                              | -                                           |
| condition x<br>region                 | $F(1, 24) = 1.03, p = .321, \eta^2 = .041$     | $F(1, 24) = 1.79, p = .194, \eta^2 = .069$     | $F(1, 54) = 1.21, p = .276, \eta^2 = .022$  |
| condition x<br>hemisphere             | $F(1.6, 37.6) < 0.01, p = .996, \eta^2 < .001$ | $F(2, 48) = 0.74, p = .481, \eta^2 = .030$     | $F(2, 108) = 0.70, p = .497, \eta^2 = .013$ |
| region x<br>hemisphere                | $F(2, 48) = 7.02, p = .002, \eta^2 = .226$     | -                                              | -                                           |
| condition x<br>region x<br>hemisphere | $F(1.5, 36.8) = 0.94, p = .376, \eta^2 = .038$ | $F(2, 48) = 3.05, p = .057, \eta^2 = .113$     | $F(2, 108) = 0.67, p = .513, \eta^2 = .012$ |
| <i>nogo N2 latency</i>                |                                                |                                                |                                             |
| condition                             | $F(1, 24) = 6.13, p = .021, \eta^2 = .204$     | $F(1, 24) = 40.27, p < .001, \eta^2 = .627$    | $F(1, 54) = 6.34, p = .015, \eta^2 = .105$  |
| region                                | $F(1, 24) = 4.71, p = .040, \eta^2 = .164$     | -                                              | -                                           |
| hemisphere                            | $F(2, 48) = 4.17, p = .021, \eta^2 = .148$     | -                                              | -                                           |
| condition x<br>region                 | $F(1, 24) = 0.03, p = .858, \eta^2 = .001$     | $F(1, 24) = 2.59, p = .121, \eta^2 = .097$     | $F(1, 54) = 0.84, p = .365, \eta^2 = .015$  |
| condition x<br>hemisphere             | $F(2, 48) = 2.94, p = .062, \eta^2 = .109$     | $F(2, 48) = 0.60, p = .552, \eta^2 = .024$     | $F(2, 108) = 0.07, p = .936, \eta^2 = .001$ |
| region x<br>hemisphere                | $F(2, 48) = 0.83, p = .442, \eta^2 = .033$     | -                                              | -                                           |
| condition x<br>region x<br>hemisphere | $F(1.5, 36.4) = 0.73, p = .452, \eta^2 = .030$ | $F(2, 48) = 0.18, p = .834, \eta^2 = .008$     | $F(2, 108) < 0.01, p = .991, \eta^2 < .001$ |

|                                 |                                                 |                                                |                                             |
|---------------------------------|-------------------------------------------------|------------------------------------------------|---------------------------------------------|
| <i>nogo P3 amplitude</i>        |                                                 |                                                |                                             |
| condition                       | $F(1, 24) = 43.91, p < .001, \eta^2 = .647$     | $F(1, 24) = 1.33, p = .260, \eta^2 = .053$     | $F(1, 54) = 11.60, p = .001, \eta^2 = .177$ |
| region                          | $F(1.5, 36.3) = 91.23, p < .001, \eta^2 = .792$ | -                                              | -                                           |
| hemisphere                      | $F(1.6, 37.4) = 7.92, p = .003, \eta^2 = .248$  | -                                              | -                                           |
| condition x region              | $F(2, 48) = 10.80, p < .001, \eta^2 = .310$     | $F(2, 48) = 9.95, p < .001, \eta^2 = .293$     | $F(2, 108) = 1.53, p = .222, \eta^2 = .027$ |
| condition x hemisphere          | $F(2, 48) = 21.00, p < .001, \eta^2 = .467$     | $F(2, 48) = 1.04, p = .360, \eta^2 = .042$     | $F(2, 108) = 3.47, p = .035, \eta^2 = .060$ |
| region x hemisphere             | $F(4, 96) = 6.66, p < .001, \eta^2 = .217$      | -                                              | -                                           |
| condition x region x hemisphere | $F(4, 96) = 6.52, p < .001, \eta^2 = .214$      | $F(4, 96) = 3.14, p = .018, \eta^2 = .116$     | $F(4, 216) = 0.83, p = .505, \eta^2 = .015$ |
| <i>nogo P3 latency</i>          |                                                 |                                                |                                             |
| condition                       | $F(1, 24) = 130.41, p < .001, \eta^2 = .845$    | $F(1, 24) = 84.79, p < .001, \eta^2 = .779$    | $F(1, 54) = 0.09, p = .761, \eta^2 = .002$  |
| region                          | $F(1.6, 38.6) = 1.69, p = .201, \eta^2 = .066$  | -                                              | -                                           |
| hemisphere                      | $F(2, 48) = 0.67, p = .518, \eta^2 = .027$      | -                                              | -                                           |
| condition x region              | $F(1.5, 36.3) = 1.61, p = .215, \eta^2 = .063$  | $F(1.2, 28.3) = 0.05, p = .861, \eta^2 = .002$ | $F(2, 108) = 0.09, p = .916, \eta^2 = .002$ |
| condition x hemisphere          | $F(2, 48) = 1.72, p = .190, \eta^2 = .067$      | $F(1.5, 36.1) = 3.45, p = .055, \eta^2 = .126$ | $F(2, 108) < 0.01, p = .999, \eta^2 < .001$ |
| region x hemisphere             | $F(4, 96) = 1.54, p = .197, \eta^2 = .060$      | -                                              | -                                           |
| condition x region x hemisphere | $F(4, 96) = 1.41, p = .236, \eta^2 = .055$      | $F(4, 96) = 0.38, p = .822, \eta^2 = .016$     | $F(4, 216) = 0.17, p = .953, \eta^2 = .003$ |
